# Supplementary material for: Determination of tryptophan metabolism from biological tissues and fluids using high performance liquid chromatography with simultaneous dual electrochemical detection
Source: Royal Society of Chemistry journal article supplement (doi:10.1039/c9an01501a), 2019-01-01
Supplement: c9an01501a1.pdf [file c9an01501a1.pdf]

## SUPPLEMENTARY INFORMATION

### Determination of tryptophan metabolism from biological tissues and fluids using high performance liquid chromatography with simultaneous dual electrochemical detection

Emily L. Brooks<sup>a,b</sup>, Vongai S. Mutengwa<sup>a</sup>, Aya Abudulla<sup>a,b</sup>, Mark S. Yeoman<sup>a,b</sup> and Bhavik Anil Patel<sup>a,b\*</sup>

<sup>a</sup>School of Pharmacy and Biomolecular Sciences and <sup>b</sup>Centre for Stress and Age-Related Disease, University of Brighton, Brighton, UK

**Supplementary Figure 1.** Correction factor that covers a varying range of 5-HTP concentrations observed in biological tissues and fluids.

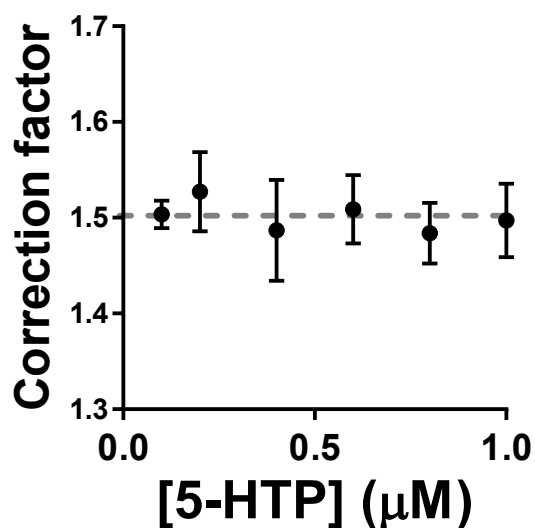

**Supplementary Table 1.** The concentration range, sensitivity, calibration coefficient and limit of detection for all the analytes explored within the 5-HT and KYN pathway

| <b>Analyte</b>           | <b>Range<br/>(<math>\mu\text{M}</math>)</b> | <b>Sensitivity<br/>(<math>\mu\text{C } \mu\text{M}^{-1}</math>)</b> | <b>R value</b> | <b>LOD<br/>(nM)</b> |
|--------------------------|---------------------------------------------|---------------------------------------------------------------------|----------------|---------------------|
| <b>Norepinephrine</b>    | 0.01 - 1                                    | $0.71 \pm 0.04$                                                     | 0.9196         | 30.91               |
| <b>Dopamine</b>          | 0.01 - 1                                    | $0.74 \pm 0.01$                                                     | 0.9975         | 30.90               |
| <b>5-HTP</b>             | 0.01 - 1                                    | $2.41 \pm 0.12$                                                     | 0.9322         | 22.45               |
| <b>5-HT</b>              | 0.01 - 1                                    | $2.80 \pm 0.03$                                                     | 0.9998         | 6.20                |
| <b>Kynurenine</b>        | 0.01 - 1                                    | $0.20 \pm 0.01$                                                     | 0.9774         | 36.77               |
| <b>DOPAC</b>             | 0.01 - 1                                    | $1.23 \pm 0.02$                                                     | 0.9999         | 7.35                |
| <b>Trpytophan</b>        | 0.01 - 1                                    | $1.90 \pm 0.10$                                                     | 0.9232         | 7.86                |
| <b>Xanthurenic acid</b>  | 0.01 - 1                                    | $0.98 \pm 0.02$                                                     | 0.9998         | 10.96               |
| <b>5-HIAA</b>            | 0.01 - 1                                    | $1.56 \pm 0.07$                                                     | 0.9456         | 21.70               |
| <b>Homovanillic acid</b> | 0.01 - 1                                    | $0.87 \pm 0.04$                                                     | 0.9330         | 21.66               |
| <b>Anthranilic acid</b>  | 0.01 - 1                                    | $1.19 \pm 0.02$                                                     | 0.9978         | 30.61               |
